# Supplementary material for: Development and verification of an immune-related gene prognostic index for gastric cancer
Source: PubMed Central journal article supplement (PMC9489759; doi:10.1038/s41598-022-20007-y), 2022-09-20
Supplement: 41598_2022_20007_MOESM1_ESM.pdf [file 41598_2022_20007_MOESM1_ESM.pdf]

**A**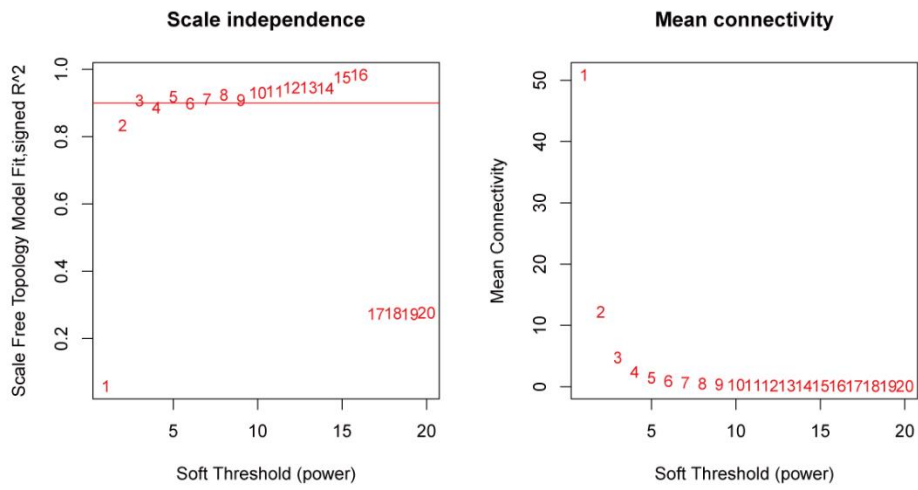**B**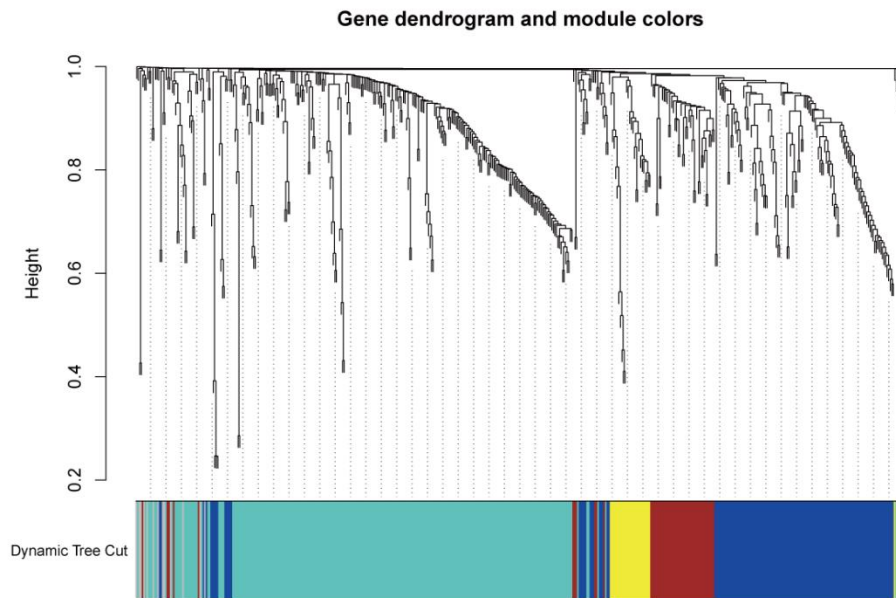

**Fig S1 (A)** The scale-free fit index and mean connectivity for various soft-thresholding powers.

**(B)** Module identification based on dynamic pruning tree. [Figures created by R, version 4.0.4.]

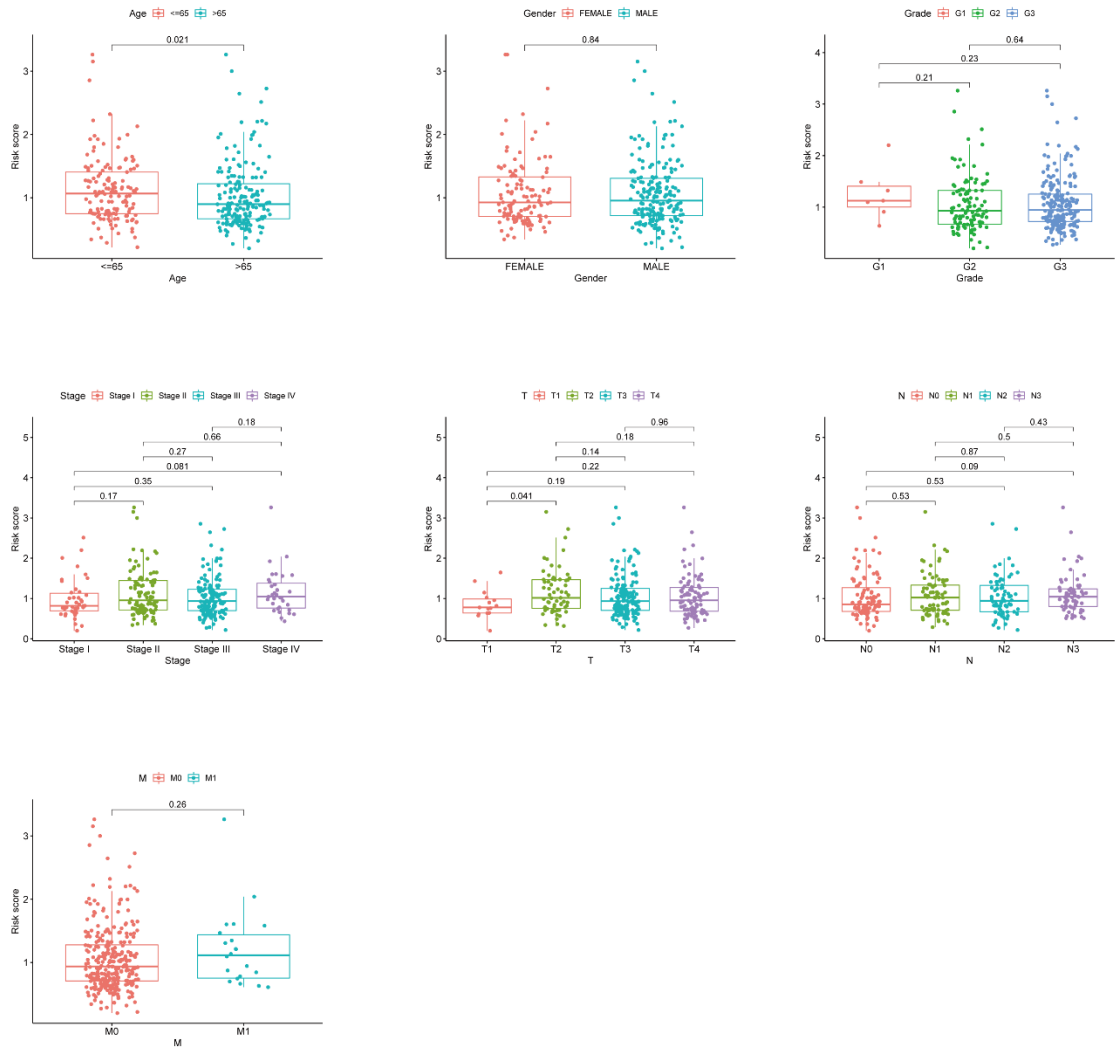

**Fig. S2** Correlation between clinical characteristics and IRGPI. [Figures created by R, version 4.0.4.]

A

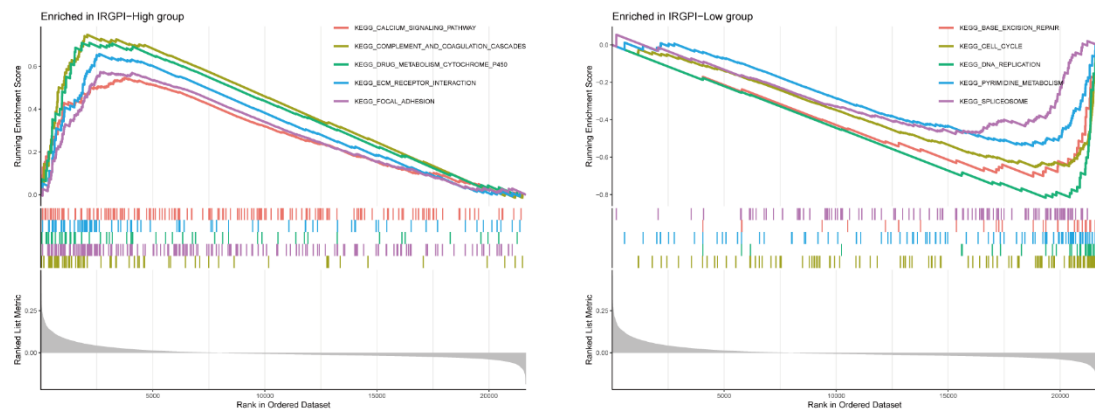

B

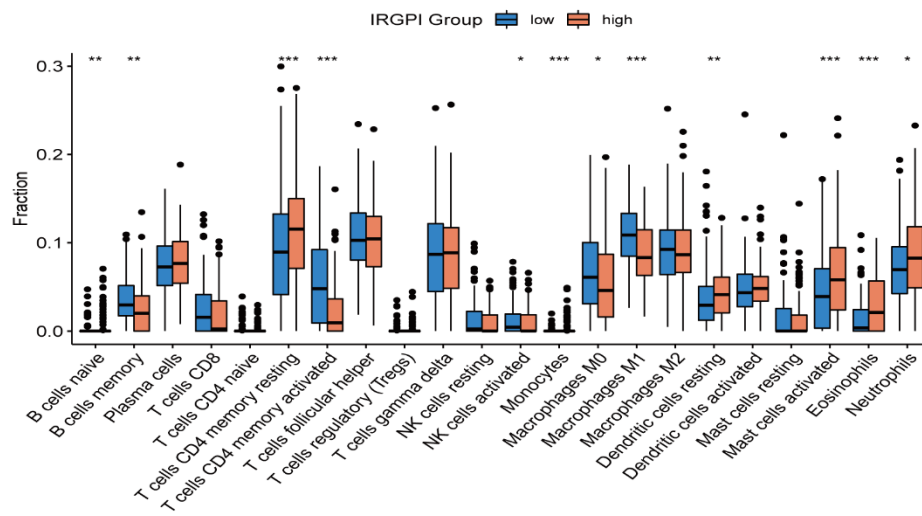

**Fig S3** Biological pathways and immune cell infiltration validated in the GSE62254 cohort (A) Gene sets enriched in IRGPI-High and IRGPI-Low groups in the GSE62254 cohort. (B) The proportions of TME cells in different IRGPI groups in the GSE62254 cohort. [Figures created by R, version 4.0.4.]
